# Supplementary material
Source: Springer Nature journal article supplement (https://www.springermedizin.de/resource/supplementary/12890_2012_334_MOESM3_ESM.pdf/9504986)

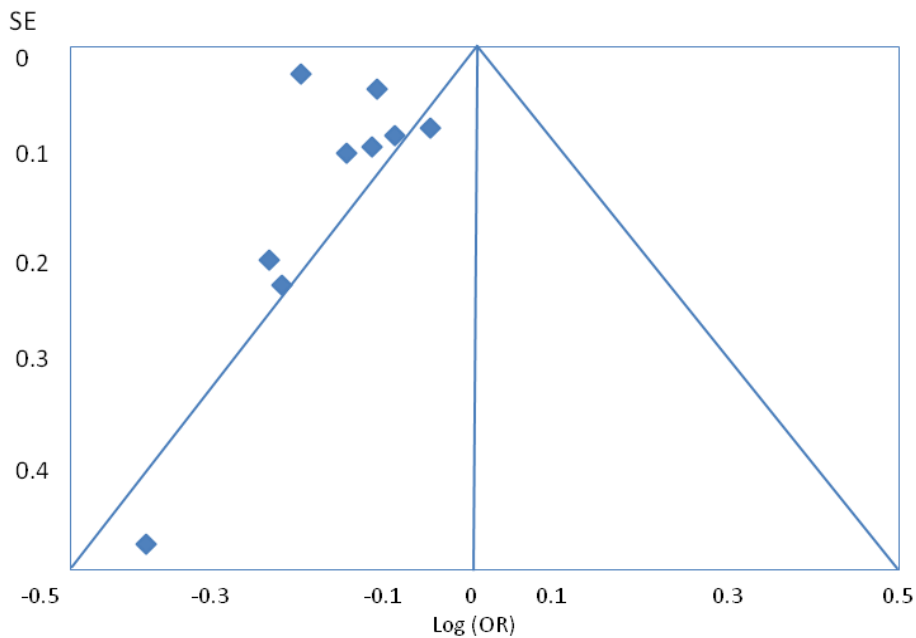

Supplement: MOESM3 [file 9504986]
